# Supplementary material for: Relationship between age at menarche and breast cancer in individuals, as well as in first-degree kin and estrogen receptor status: a Mendelian randomization study
Source: Front Oncol. 2024 Jun 14;14:1408132. doi: 10.3389/fonc.2024.1408132 (PMC11211530; doi:10.3389/fonc.2024.1408132)
Supplement: Supplementary file 1 [file Table_1.xlsx]

## Sheet: Sheet1
Relationship between age at menarche and breast cancer in individuals, as well as in first-degree kin and estrogen receptor status: a Mendelian randomization study
Zhijun Zhao1 Jinming Zhang2 Xiaofeng Tian1,3
1.Department of Thyroid and Breast Surgery, China-Japan Union Hospital of Jilin University, Jilin University, Changchun, China
2.First Hospital of Jilin University, Jilin University, Changchun, China
3.Department of Thyroid and Breast Surgery, China-Japan Union Hospital of Jilin University, Jilin University, Changchun, China, txf@jlu.edu.cn.

## Sheet: Sheet2
Study Name / acronym	Full Study name	Sample N (geno+pheno)	Mean age (SD)	Mean AAM (SD)	Mean BMI (SD)	SNP array	Imputation reference panel	Analysis program	Specific Menarche question
ALSPAC	Avon Longitudinal Study of Parents and Children	10020	Mothers: 28.48 (4.67), Children Subjects were asked over multiple questionnaires starting at approximately age 97 months up to 17 years. The first-reported age at onset of menarche was used.	Mothers: 12.82 (1.47), Children: 12.67 (1.13)	Mothers: 22.93 (3.77), Children: 20.78 (3.40)	Mothers: Illumina human660W-quad, Children: Illumina HumanHap550 quad	1000 Genomes phase I version 3	GEMMA (version 0.94)	Mothers: How old were you when your periods first started?, Children; The first-reported age at onset of menarche was used. Either "How old was your daughter when she had her first period?" was asked to the childs mother or "How old were you when you had your first period?" was asked to the young adult at several questionnaire sweeps.
ARICWHITE	Atherosclerosis Risk in Communities	3120	55.2 (5.4)	12.9 (1.5)	26.6 (5.4)	Affymetrix 6.0	1000HG Cosmopolitan panel (version 3, March 2012 release)	probAbel	How old were you when your menstruation started?
CARL	INGI-CARLANTINO	294	47.2(17.2)	12.9(1.6)	27 (5.9)	Illumina 370K	1000 Genomes phase I v3 reference set	GenABEL, ProbABEL	How old were you when your menstruation started?
CILENTO	CILENTO	625	50.37 (18.67)	13.16 (1.59)	not available	Illumina 370 K (859 individuals) , Illumina OmniExpress 700K (758 individuals)	1000G Phase I Integrated Release Version 3 Haplotypes	GenABEL and Probabel	How old were you at the time of your first menstrual period?
CROATIA Korcula	CROATIA_Korcula	453	54.86(14.09)	13.7 (1.63)	27.47(4.14)	Illumina HumanHap 370CNV	1000G Phase 1 v3 March 2012	GenABEL/ProbABEL	What age were you when you had your first period?
CROATIA Vis	CROATIA_Vis	502	56.61(15.82)	13.51(1.64)	27.15(4.06)	Illumina HumanHap 300v1	1000G Phase 1 v3 March 2012	GenABEL/ProbABEL	What age were you when you had your first period?
EGCUT-370	EGCUT	1354	45,8 (15.2)	13.4 (1.56)	26,5 (9,51)	Illumina Human370CNV	1000Genomes ver1	SNPTEST v2	"How old you where when you had your first menstruation event?", "How long were your menstrual period in the age 25 to 35?", "How long after your first menstruation did your menstrual periods became regular?"
EGCUT-OmniX	EGCUT	3261	48,6 (17,1)	13.6 (1.45)	28,6 (8,65)	Illumina OmniExpress	1000Genomes ver1	SNPTEST v2	"How old you where when you had your first menstruation event?", "How long were your menstrual period in the age 25 to 35?", "How long after your first menstruation did your menstrual periods became regular?"
EPIC	European Prospective Investigation into Cancer and Nutrition ‐ Obesity study cohort	10640	58.7 (9.0)	12.9 (1.8)	28.6 (5.3)	Affymetrix UK Biobank chip	1000G v3 March 2012	SNPTEST	How old were you when you had your first menstrual period?
GOYA-CASES	Genomics of Obesity in Young Adults (Obese subgroup)	1780	28.9(4.3)	12.8 (1.3)	37.3(3.4)	Illumina 610k Quad	1000G v3 March 2012	mach2dat/mach2qtl	How old were you when you had your first menstrual period?
GOYA-CONTROLS	Genomics of Obesity in Young Adults (Non-obese subgroup)	1746	29.1(4.3)	13.3 (1.3)	23.1(3.4)	Illumina 610k Quad	1000G v3 March 2012	mach2dat/mach2qtl	How old were you when you had your first menstrual period?
GS	Generation_Scotland:Scottish Family Health Study	2271	51.6(13.64)	12.85 (1.47)	26.7(5.19)	Illumina OMNIexpress+exome	1000G Phase 1 v3 March 2012	GenABEL/ProbABEL	What age were you when you had your first period?
INCHIANTI	Invecchiare in Chianti	553	68.6 (15.1)	13.26 (1.44)	27.21 (4.74)	Illumina HumanHap 550K	Phase I v3	ProbABEL	How old were you when you had your first menstrual period?
InterAct cases	The EPIC-InterAct Study	3157	55.85 (8.03)	12.96 (1.62)	30.30 (5.31)	Illumina 660w quad and Illumina CoreExome chip	1000G v3 March 2012	SNPTEST	Age when you stopped having your periods
InterAct cohort	The EPIC-InterAct Study	5482	52.03 (9.42)	13.08 (1.50)	25.74 (4.53)	Illumina 660w quad and Illumina CoreExome chip	1000G v3 March 2012	SNPTEST	Age when you stopped having your periods
KORAF3	Cooperative Health Research in the Augsburg Region, Follow up for Study S3	1550	56.86 (12.60)	13.54 (1.50)	27.26 (5.18)	Illumina Omni 2.5 and Illumina Omni Express	1000g phase1 all	SNPTEST	At what age did you have your first menstruation/period (menarche)?
KORAF4	Cooperative Health Research in the Augsburg Region, Follow up for Study S4	1462	55.49 (13.07)	13.46 (1.49)	26.87 (5.16)	Affymetrix Axiom	1000g phase1 all	SNPTEST	At what age did you have your first menstruation/period (menarche)?
LifeLines	LifeLines	7485	51.52 (10.57)	13.17 (1.45)	26.19 (4.74)	Illumina CytoSNP-12v2	1000 Genomes, Phase1 v3	PLINK v1.9	How old were you when you got your first menstrual period?
NEO	Netherlands Epidemiology of Obesity	2949	55.8 (5.9)	12.9 (1.5)	30.2 (5.5)	Illumina HumanCoreExome-24v1_A Beadchip	2011 v3	Probabel v0.4.5	How old were you when your menstruation started?
NHS_Affymetrix	Nurses' Health Study_Affymetrix	4159	56.4 (6.75)	12.5 (1.39)	26.8 (5.49)	Affymetrix	1000G Phase I Integrated Release Version 3 Haplotypes (2010-11 data freeze, 2012-03-14 haplotypes)	ProbABLE	At what age did your menstrual periods begin?___ years of age
NHS_Illumina	Nurses' Health Study_Illumina HumanHap	4586	52.6 (9.88)	12.5 (1.39)	25.1 (4.71)	Illumina HumanHap	1000G Phase I Integrated Release Version 3 Haplotypes (2010-11 data freeze, 2012-03-14 haplotypes)	ProbABLE	At what age did your menstrual periods begin?___ years of age
NHS_OmniExpress	Nurses' Health Study_OmniExpress	3336	56.5 (6.66)	12.5 (1.38)	25.9 (5.12)	Omni Express	1000G Phase I Integrated Release Version 3 Haplotypes (2010-11 data freeze, 2012-03-14 haplotypes)	ProbABLE	At what age did your menstrual periods begin?___ years of age
NTR	Netherlands Twin Register	4084	41.4 (14.1)	13.6 (1.3)	24.6 (4.4)	Multiple: Illumina 370,660,1M. Affymetrix-Perlegen, Affymetrix 6.0	March 2012 1000G Phase 1	Plink 1.07	How old were you when you had your first menstrual period?
ORCADES	Orkney Complex Disease Study	1038	55.02 (13.70)	12.89 (1.39)	NA	Illumina Hap300, Omni, OmniX	1000Genomes Phase1 v3	ProABEL	How old were you when you had your first menstrual period?
QIMR	QIMR Adult Cohort	10093	36.7501 (12.73793)	12.9949 (1.37547)	23.2125 (4.47828)	Illuminia 370, 610, 660, CoreExome & PsychArray	1000-Genomes Phase 3 v5 reference (imputed using the UM Imputation cluster)	RareMetalWorker	.At what age did you have your first menstrual period? _____ years
SARDINIA	SardiNIA	3661	43.27 (17.31)	13.12 (1.56)	24.69 (4.99)	OmniExpress + MetaboChip + ImmunoChip + ExomeChip	1000G	EPACTS	“At what age did your menstrual periods begin?”
SHIP	Study of Health in Pomerania (2nd follow-up)	1136	56.04 (13.06)	13.49 (1.55)	26.32 (5.00)	Affymetrix SNP 6.0	1000Gv3	QUICKTEST 0.95	At what age did your menstrual periods begin?
SHIP-TREND	Study of Health in Pomerania - Trend	536	50.02 (13.23)	13.28 (1.54)	26.94 (5.08)	Illumina Omni 2.5	1000Gv3	QUICKTEST 0.95	At what age did your menstrual periods begin?
TRAILS-CC	TRacking Adolescents’ Individual Lives Survey - Clinical Cohort	96	15.81 (0.63)	12.67 (1.20)	22.53 (3.85)	Illumina Cyto SNP12 v2	1000G Phase 1_v3 global panel (March 2012)	SNPTEST v2.2.0	How old were you when you had your first period (years + months)?
TRAILS-Pop	TRacking Adolescents’ Individual Lives Survey - POPulation cohort	697	16.20 (0.69)	12.93 (1.14)	21.73 (3.14)	Illumina Cyto SNP12 v2	1000G Phase 1_v3 global panel (March 2012)	SNPTEST v2.2.0	How old were you when you had your first period (years + months)?
TWINGENE	TWINGENE	4596	58.11 (8.12)	13.47 (1.45)	25.83 (4.30)	Illumina HumanOmniExpress-12v1 beadchip.	1000Gv3	PLINK v1.07	How old were you when you had your first menstrual period?
TWINSUK	TWINSUK	4848	54.38 (15.25)	12.99 (1.56)	25.23 (13.21)	Illumina (HumanHap300, HumanHap610Q)	1,000 Genomes Phase I integrated variant set release (SHAPEIT2) released on 16 Jun 2014	GEMMA V 0.94.1	How old were you when you had your first period? \ years
VB	Val Borbera	980	54.71 (17.94122)	12.9 (1.495988)	25.59 (4.871102)	HumanCNV370-Quadv3_C (1664 samples) + HumanOmniExpress-12v1_H (121 samples)	1000G_phase1integrated_v3	IMPUTE	How old were you when your menstruation started?
AGES	Age, Gene/Environment Susceptibility-Reykjavik Study (AGES-Reykjavik)	1863	76.32 (5.54)	13.61 (1.35)	N.A.	Illumina Hu370CNV	GIANT.phase1_release_v3.20101123	probABEL	Age when menstrual periods began
FHS	Framingham Heart Study	3801	42.5(10.0)	12.8 (1.5)	24.9(5.4)	Affy 500K + 50K gene-based	1000G (All ethnicity) 3/14/2012	R, LMEKIN function	Gen 3 cohort: How old were you when you had your first menstrual period (menses)?; Offspring cohort: Age periods started?
RSI	Rotterdam Study I	3175	69.6 (9.3)	13.5 (1.6)	26.7 (4.1)	Illumina HumanHap 550K	1kg PhaseIv3	MACH2QTL	“How old were you when you had your first menstrual period?”
RSII	Rotterdam Study 2	1119	65.1 (8.4)	13.3 (1.6)	27.5 (4.4)	Illumina HumanHap 550K	1kg PhaseIv3	MACH2QTL	“How old were you when you had your first menstrual period?”
RSIII	Rotterdam Study 3	1112	56.2 (6.1)	13.1 (1.6)	27.5 (5.1)	Illumina HumanHap 550K	1kg PhaseIv3	MACH2QTL	“How old were you when you had your first menstrual period?”
WGHS	Women's Genome Health Study	23268	54.69 (7.11)	12.43 (1.44)	25.91 (4.96)	HumanHap 300 duo "+"	1000 G phase I, v. 3 March 2012	ProbABEL	At what age did your periods begin? 9 or younger; 10; 11; 12; 13; 14; 15; 16; 17 or older.
UKBB	UK Biobank	73397	56.62 (8.03)	12.96 (1.62)	27.55 (4.84)	Affymetrix UK Biobank chip	1000 Genomes Phase 3	BOLT	"How old were you when your periods started?"
23andMe	The 23andMe Research Program	76831	49.9 (15.5)	13.0 (1.6)	26.3 (6.3)	Custom	March 2012 ‘v3’ release of 1000 Genomes	In house	How old were you when you had your first menstrual period? (<8, 8-9, 10-11, 12-13, 14-15, 16+, not sure) [responses were mapped to ages 7,9,11,13,15,17]
